# Supplementary material for: Machine-Learning algorithms identifies sTREM1 has a key biomarker for outcome prediction in a mixed-ICU population
Source: Research Square preprint supplement (doi:10.21203/rs.3.rs-8554617/v1), 2026-01-20

# Supplementary Material

**Flow-Chart**
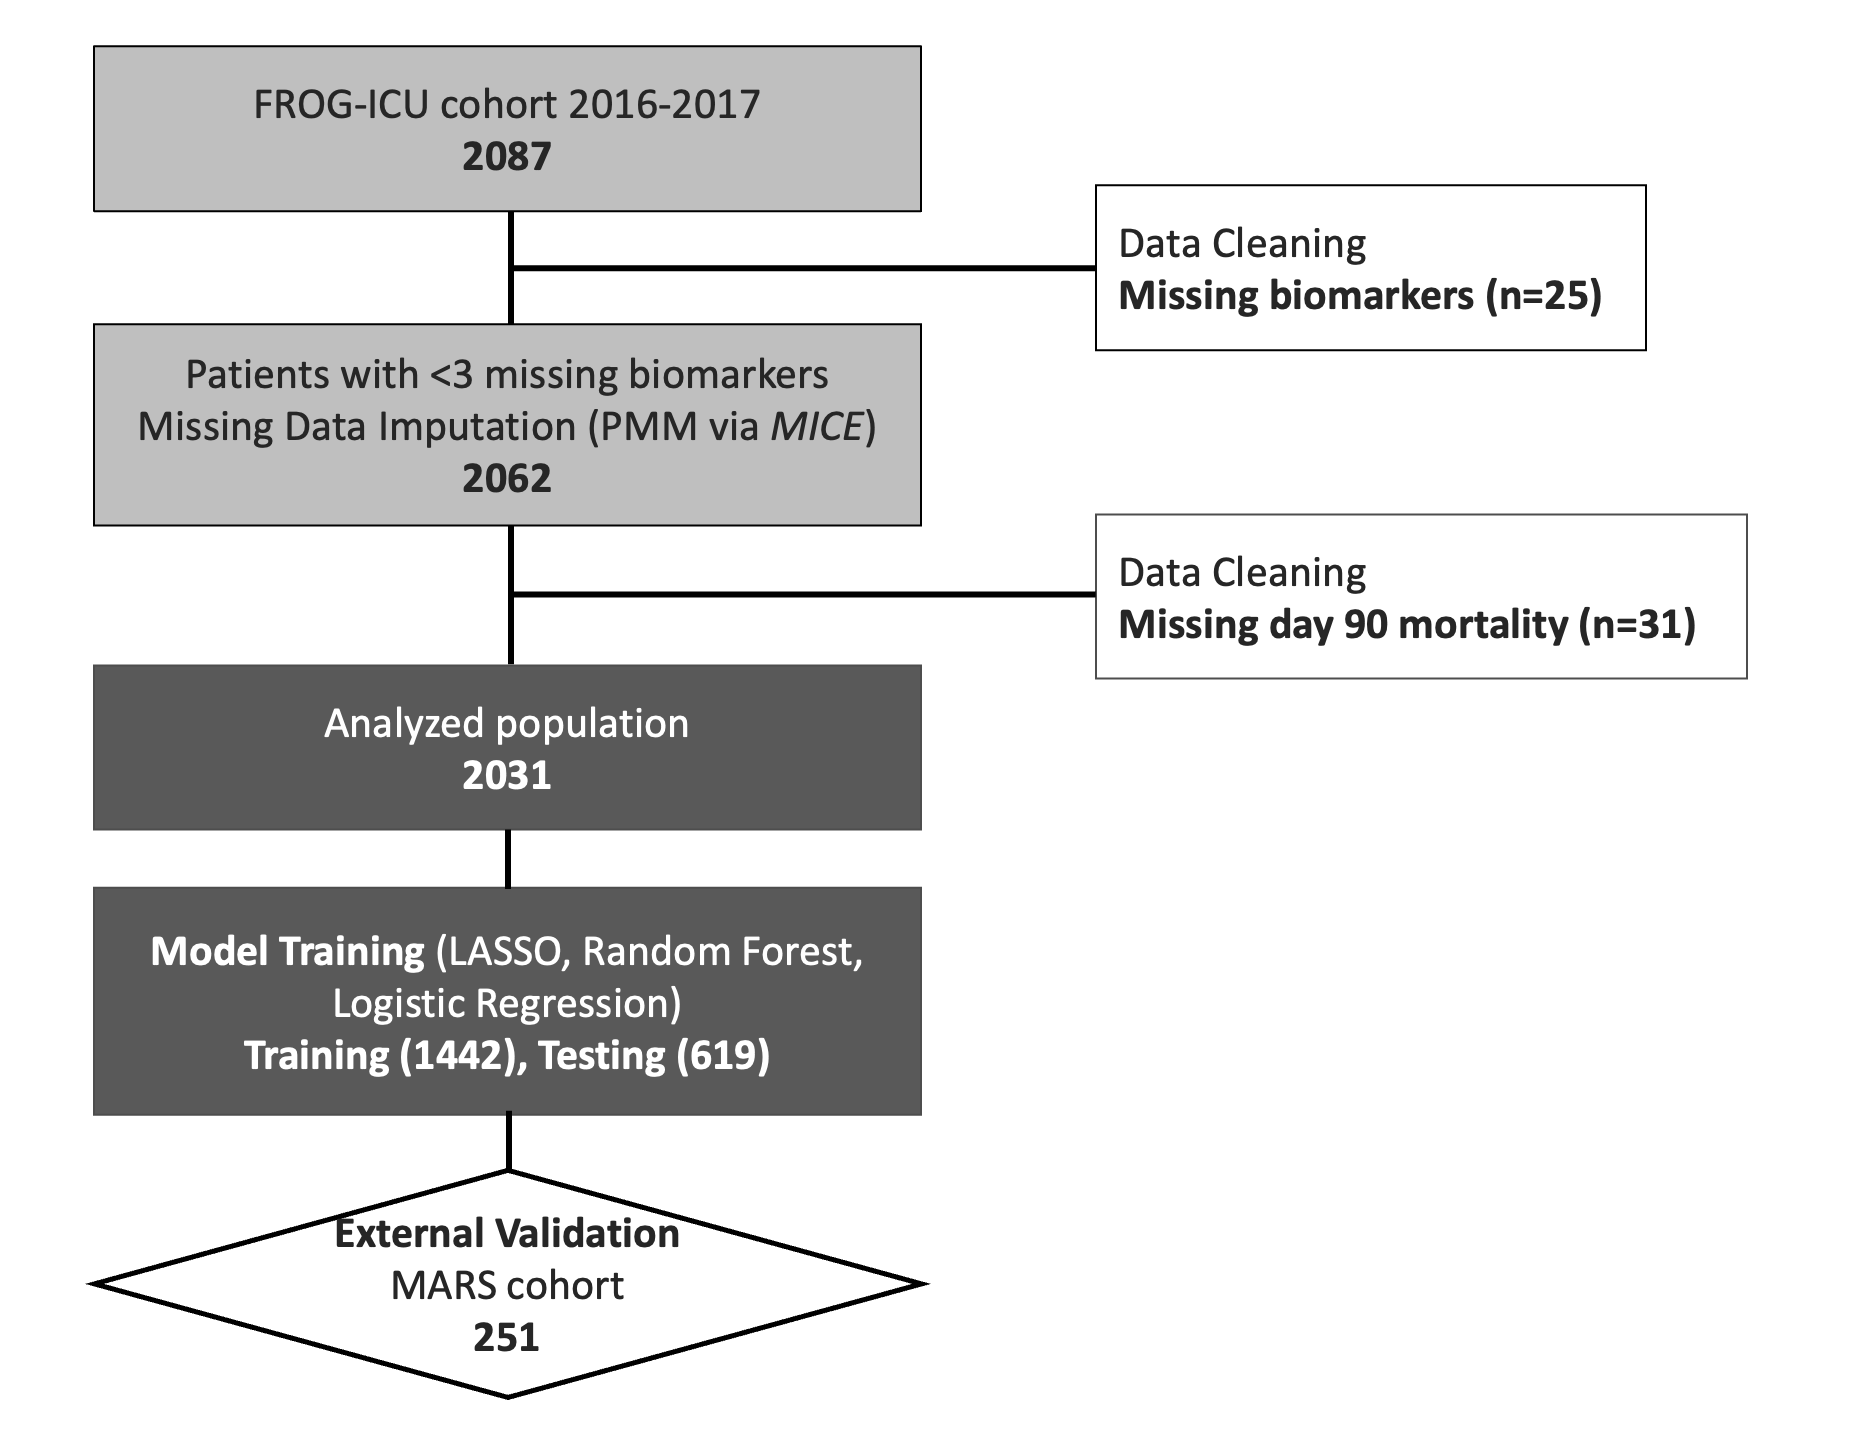


**Supplementary Table 1.** List and brief description of the 14 tested biomarkers

| Biomarker | Full Name | Function |
| --- | --- | --- |
| sFlt-1 | Soluble fms-like tyrosine kinase-1 | Inhibits VEGF signaling; marker of endothelial dysfunction and sepsis |
| PIVKA-II | Protein Induced by Vitamin K Absence-II | Reflects impaired vitamin K–dependent coagulation; marker of liver dysfunction |
| GDF-15 | Growth Differentiation Factor 15 | Stress-induced cytokine elevated in tissue injury and inflammation |
| Presepsin | Soluble CD14 subtype (PresepA & B) | Early marker of bacterial infection and sepsis severity |
| sTREM-1 | Soluble Triggering Receptor on Myeloid cells-1 | Released from myeloid cells during infection; correlates with sepsis severity |
| ESM-1 | Endocan | Indicates endothelial activation and vascular permeability |
| ANG-2 | Angiopoietin-2 | Mediator of vascular instability and inflammation; linked to shock and poor prognosis |
| IGFBP-7 | Insulin-like Growth Factor Binding Protein 7 | Marker of cellular stress; used in AKI risk prediction (especially with TIMP-2) |
| Tie-1 | Tyrosine kinase with immunoglobulin-like and EGF-like domains 1 | Regulates angiogenesis and vascular integrity; elevated in endothelial stress |
| Calprotectin | S100A8/A9 protein complex | Neutrophil-derived protein elevated in acute inflammation and infection |
| CRP | C-Reactive Protein | Classic acute-phase reactant produced by hepatocyte in response to IL-6 |
| suPAR | Soluble Urokinase Plasminogen Activator Receptor | Reflects immune activation and is predictive of mortality in critical illness |
| IL-6 | Interleukin-6 | Central mediator in the acute-phase response and systemic inflammation |
| HBP | Heparin-Binding Protein | Neutrophil-derived protein. Increases vascular permeability, early predictor of sepsis severity and circulatory failure |
| IFN- γ | Interferon-gamma | Major pro-inflammatory cytokine critical in innate and adaptive immunity. |

**Supplementary Table 2.** Table below shows the number of available measurements and the distribution of the 15 tested biomarkers expressed in pg/mL.


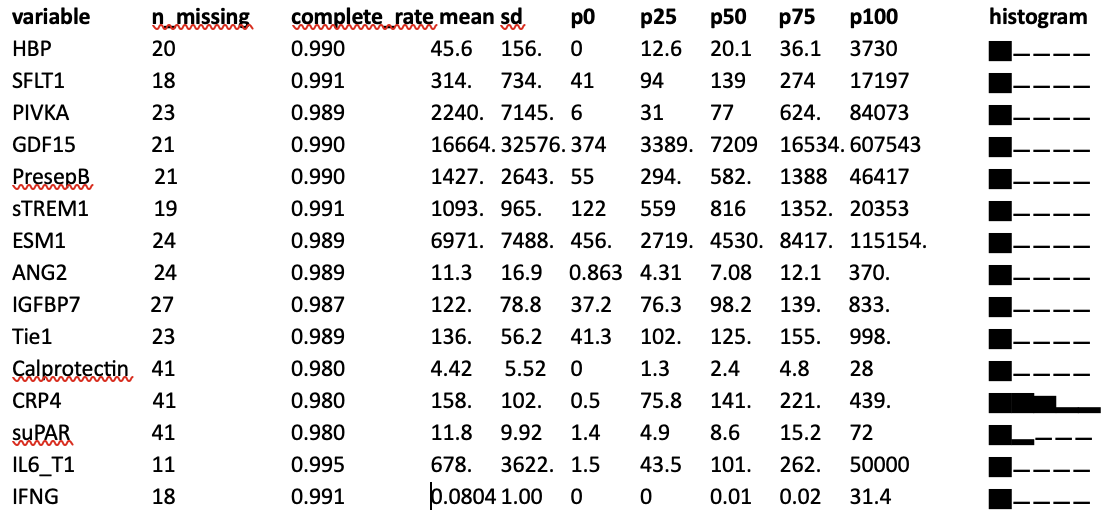


**Supplementary Table 3.** Table of sorted coefficient value in the LASSO model

|  | **90-day mortality** | **MAKE in ICU** | |
| --- | --- | --- | --- |
| **Variable** | **Absolute coefficient** | **Variable** | **Absolute coefficient** |
| **sTREM1** | 0.297966758 | **sTREM1** | 0.89615935 |
| **IGFBP7** | 0.223179082 | **PresepB** | 0.33110732 |
| **suPAR** | 0.183748521 | **SAPS_II** | 0.26198825 |
| **SFLT1** | 0.095770795 | **IGFBP7** | 0.09128629 |
| **CRP4** | 0.040403968 | **ESM1** | 0.06351148 |
| **IL6** | 0.027140985 | **GDF15** | 0.01748228 |
| **SAPS II** | 0.018510959 | - | - |

**Supplementary Figure 1.** Correlation plot of the tested biomarkers. Red denotes positive correlation and blue denotes negative correlation. The darker the color, the greater the correlation c​o​e​f​f​i​c​i​e​n​t​. Spearman correlation.


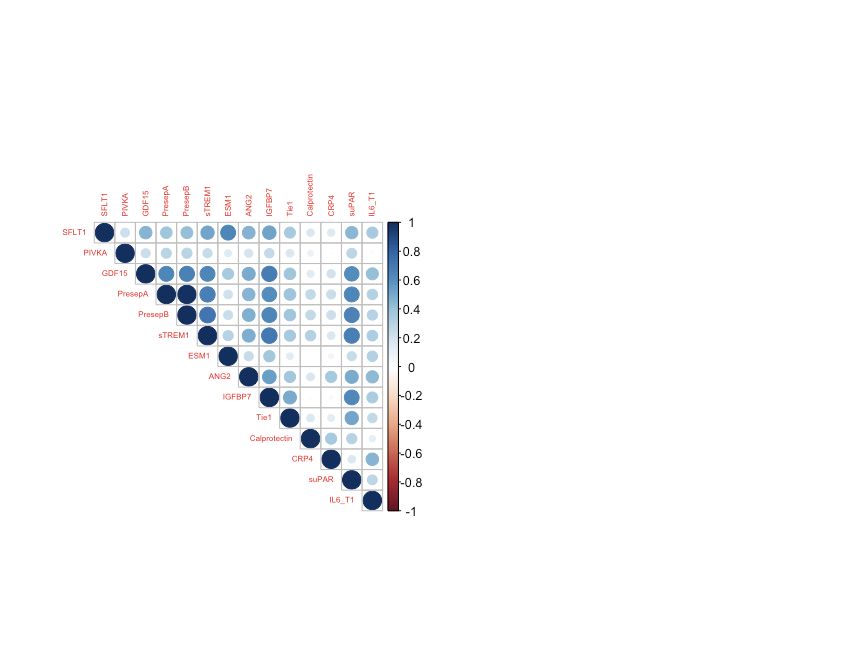


**Supplementary Figure** 2. Spearman correlation of sTREM1 on admission and severity score on admission (SAPS II) (left), spline curve of association between sTREM1 (log-transformed) and ICU-mortality (right)


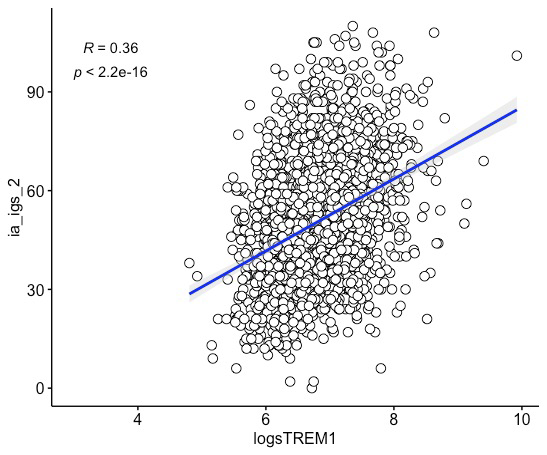


**Supplementary Figure 3**. Mean decrease in accuracy plot from the Random Forest model showing the relative importance of variables (top to bottom). This figure highlights the role of sTREM-1 in predicting MAKE in ICU patients.


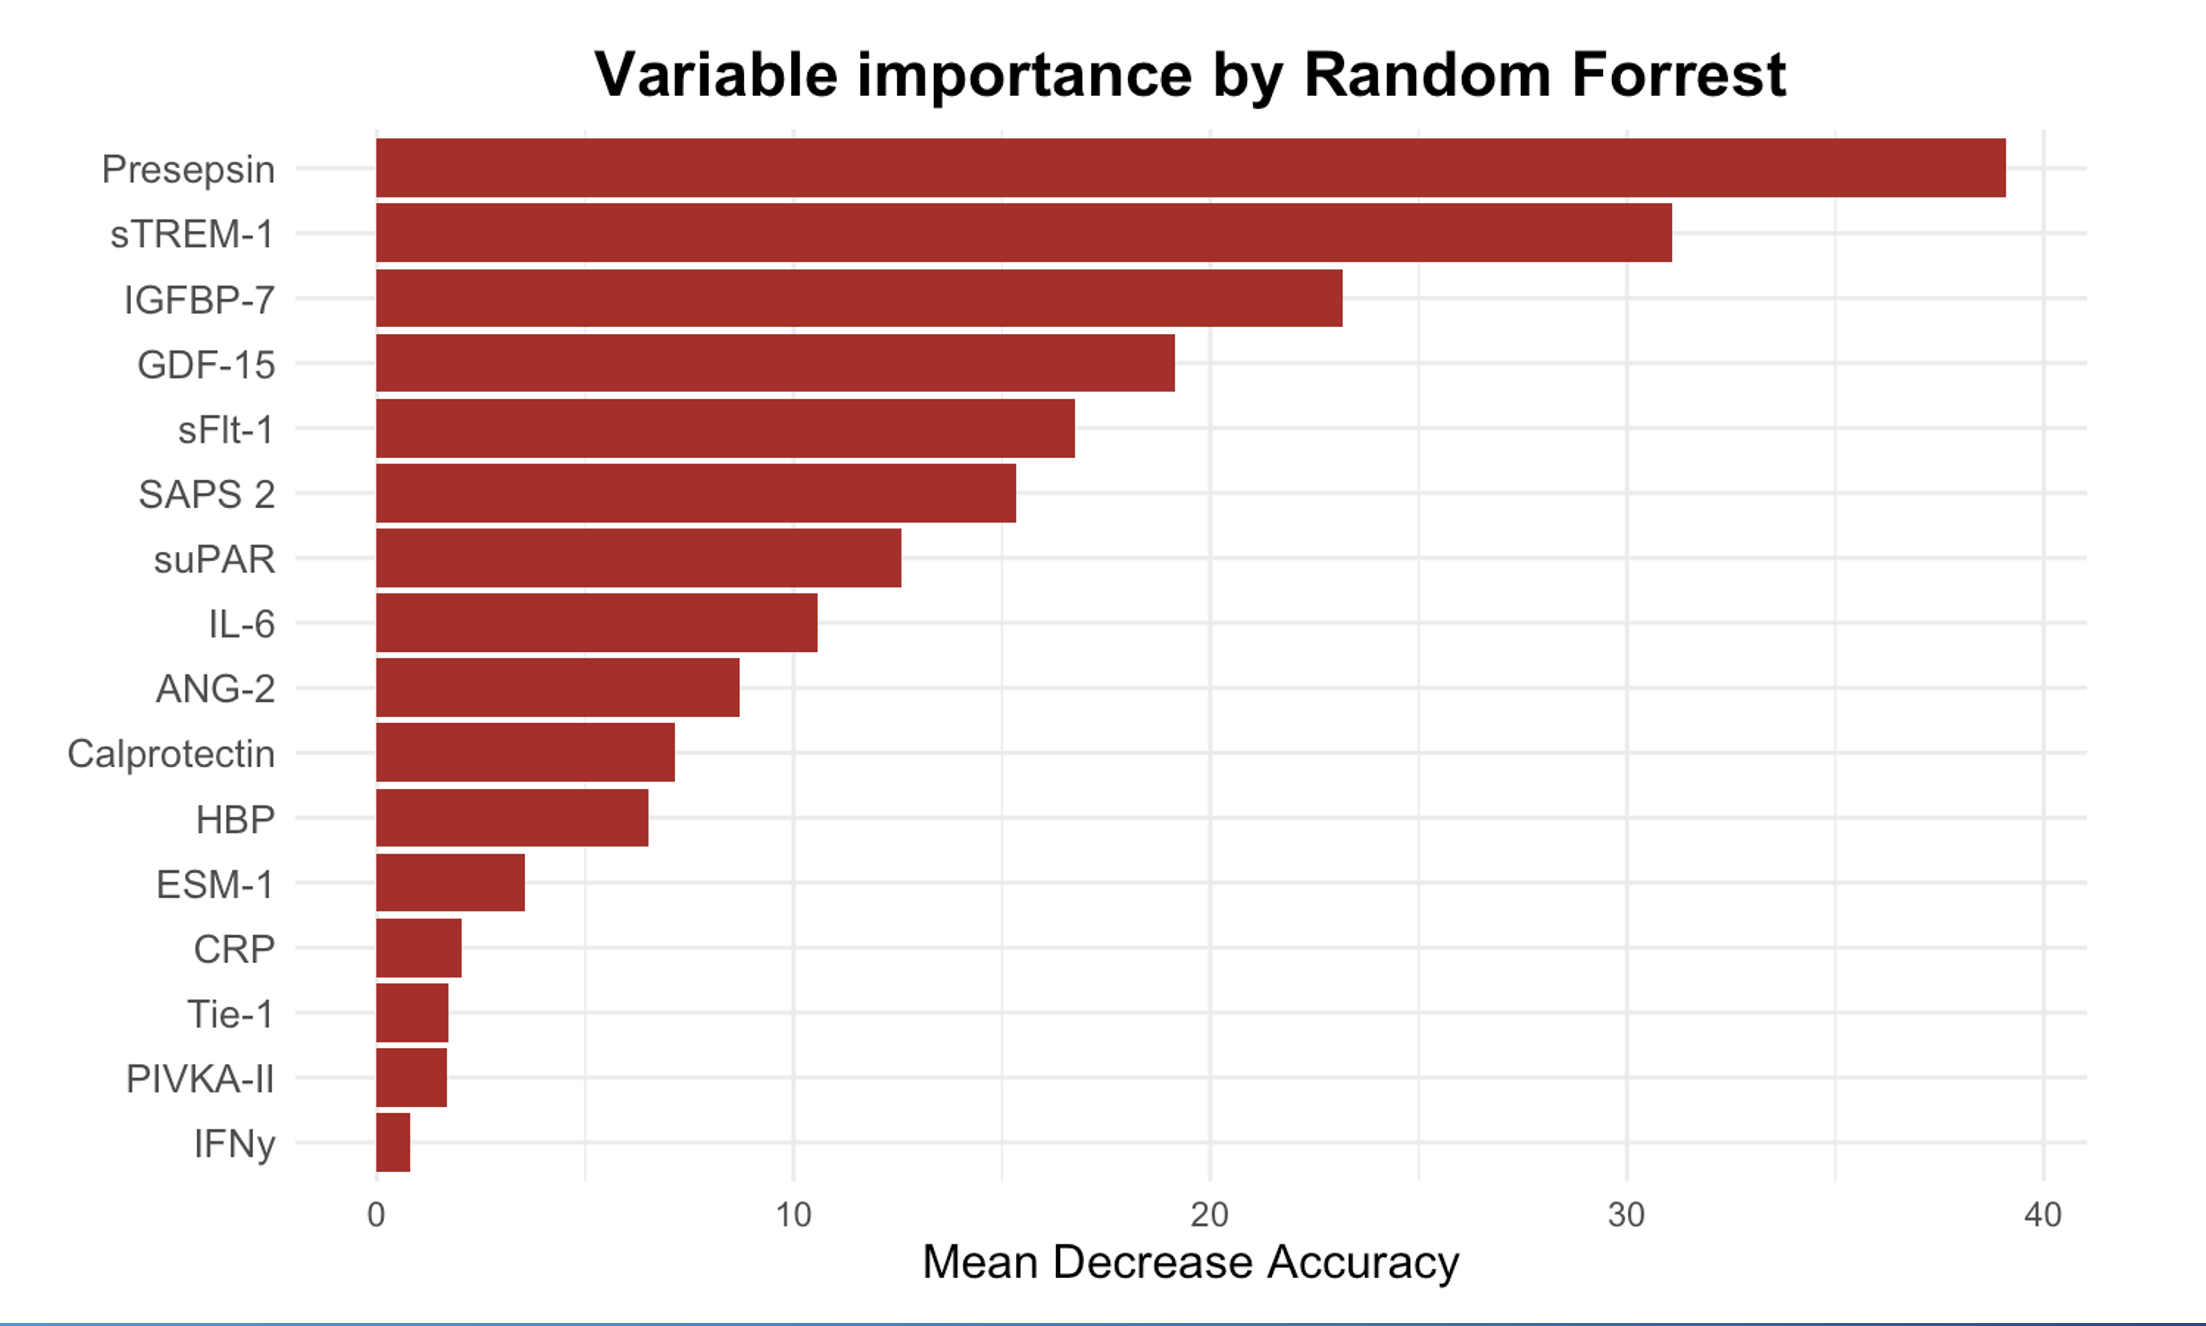

Supplement: Supplementary file 2 [file d06bad1f4090e5bc072e2ee3.docx]
