# Supplementary material for: Machine-Learning algorithms identifies sTREM1 has a key biomarker for outcome prediction in a mixed-ICU population
Source: Research Square preprint supplement (doi:10.21203/rs.3.rs-8554617/v1), 2026-01-20
Supplement: Supplementary file 1 [file 377bdbf28f1db44fec1ab4aa.docx]

**Table 1.** Baseline characteristics and outcomes between survivors and non survivors in the FROG-ICU cohort and the MARS cohort stratified according to day 28 mortality

**
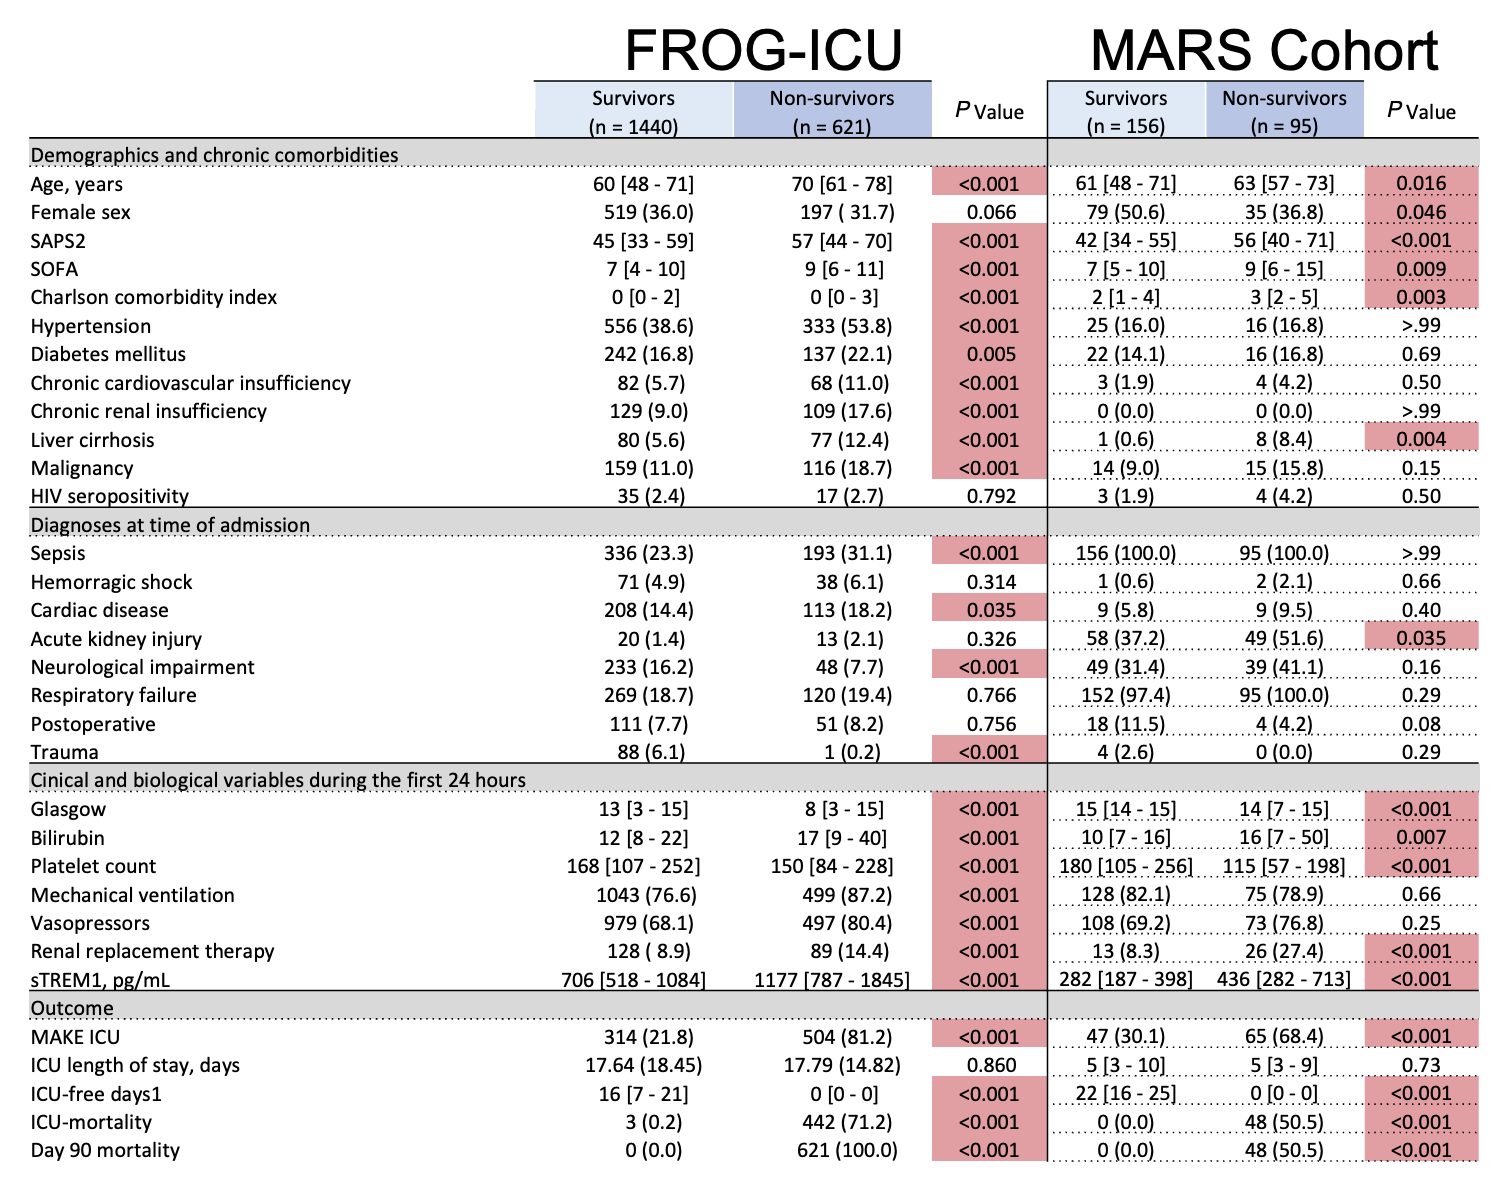
**

*Data are presented as median [IQR] or n (%). Comparisons between survivors and non-survivors were performed using appropriate statistical tests, with significant p-values highlighted. ICU-free days at day 28: Number of days within the first 28 days after admission during which the patient is alive and not in the ICU. Patients who die before day 28 are assigned 0 ICU-free days. MAKE (Major Adverse Kidney Events): Composite endpoint including death, need for renal replacement therapy, or persistent renal dysfunction at follow-up (as defined in the original cohort criteria). ICU-mortality: Death occurring during the ICU stay. Day-90 mortality: All-cause mortality at 90*
